# Supplementary material
Source: MDPI journal article supplement (https://www.mdpi.com/1999-4907/13/12/1994)
Supplement: s1 [file s1]

## Supplementary materials

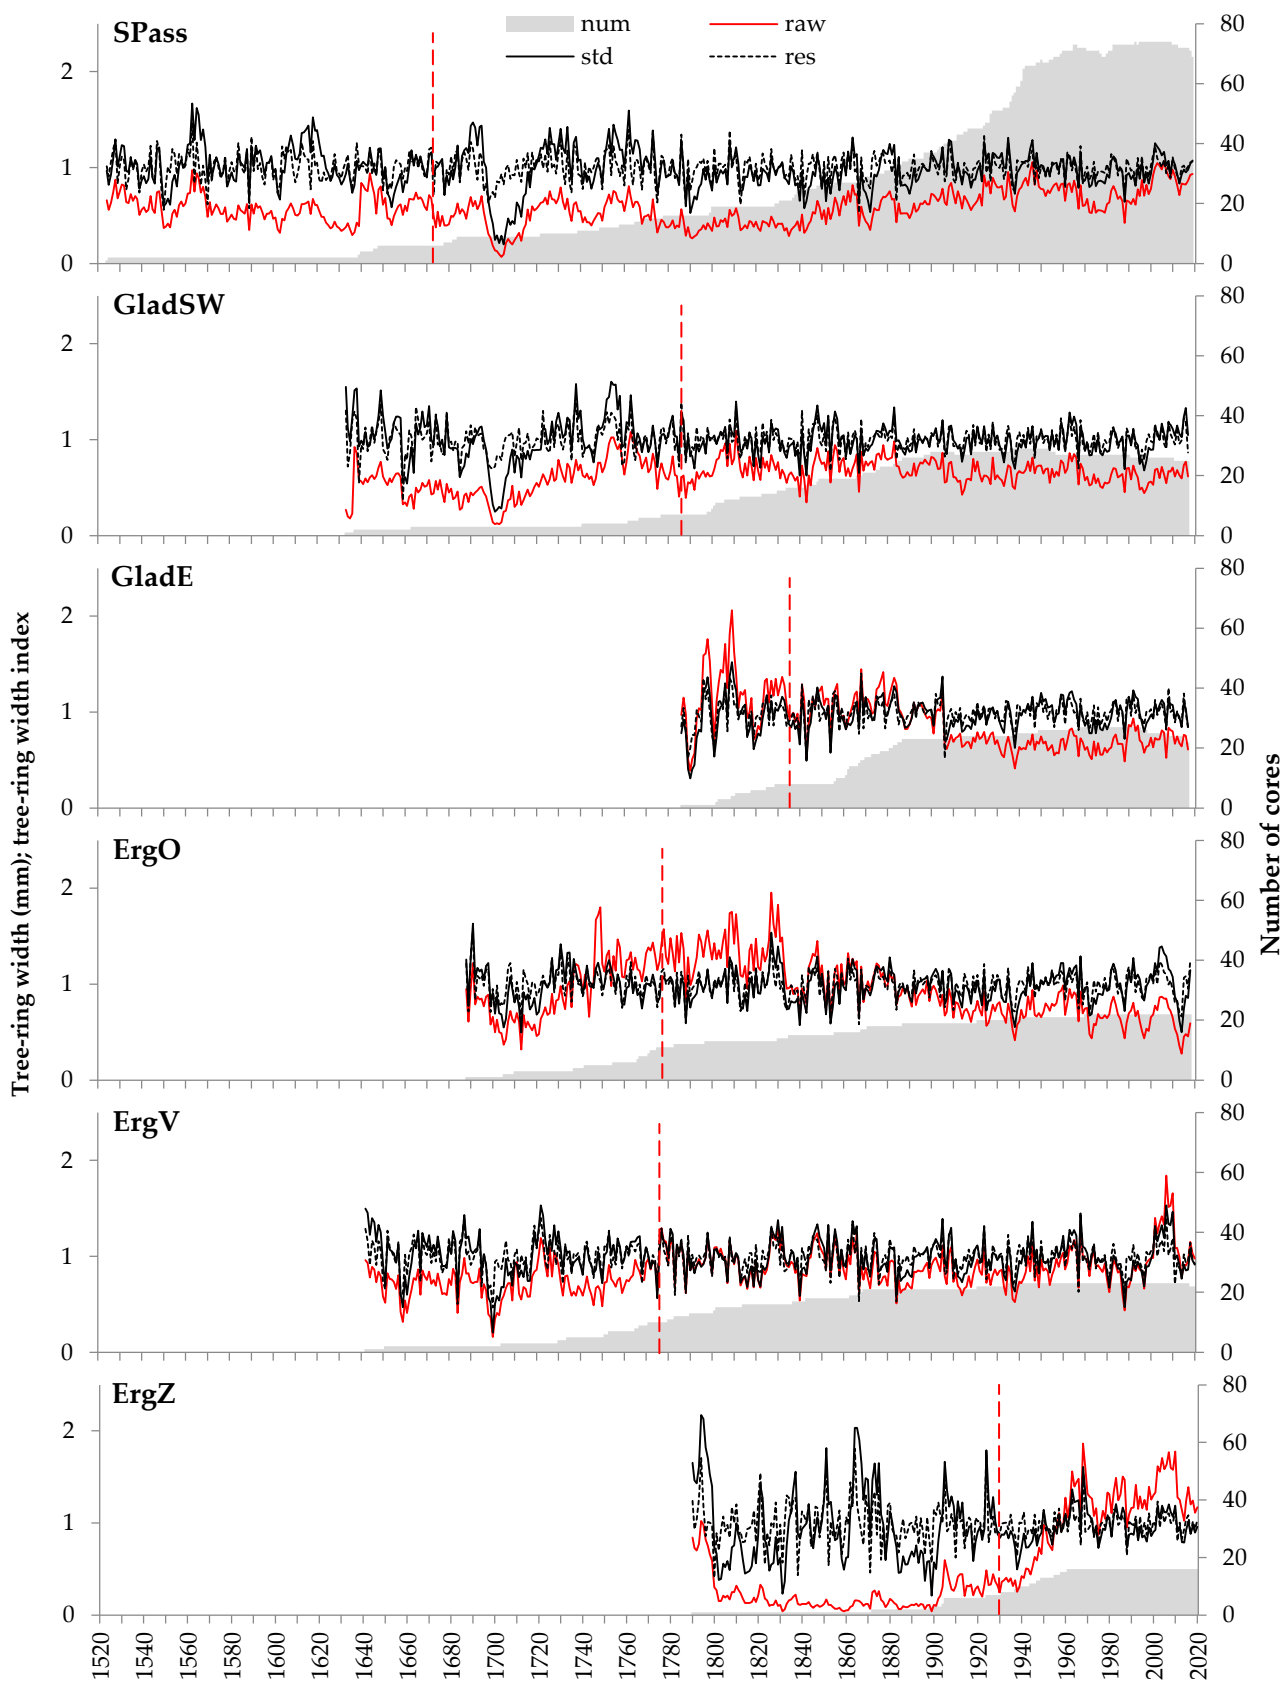

**Figure S1.** Tree-ring width of *P. sibirica*: raw (red lines), standard (*std*, solid black lines), and residual (*res*, dashed black lines) chronologies at each sampling site, and sample depth (grey area). Vertical dashed red lines represent year when expressed population signal EPS exceeds threshold 0.85

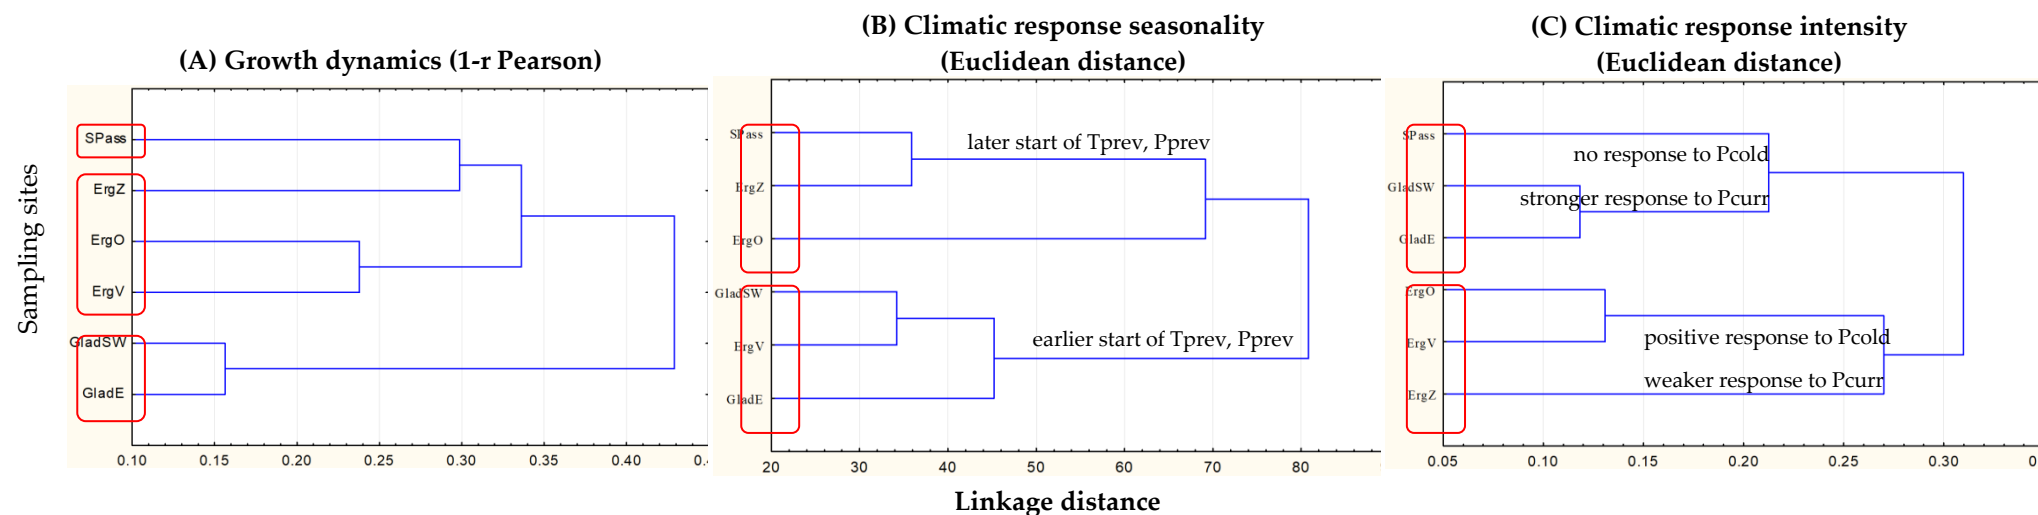

**Figure S2.** Hierarchical classification of local residual TRW chronologies according to **(A)** similarity of growth dynamics expressed through correlations between chronologies over the 1936–2010 period; **(B)** seasonality of climatic response expressed through starting and ending dates for climatic variables causing maximal response in pine TRW (Table 3); **(C)** intensity of climatic response expressed through values of maximal dendroclimatic correlations. Three distinctive clusters marked in (A) match the study areas; for two clusters selected arbitrarily in (B) and (C), differences between clusters significant at  $p < 0.05$  are labeled.

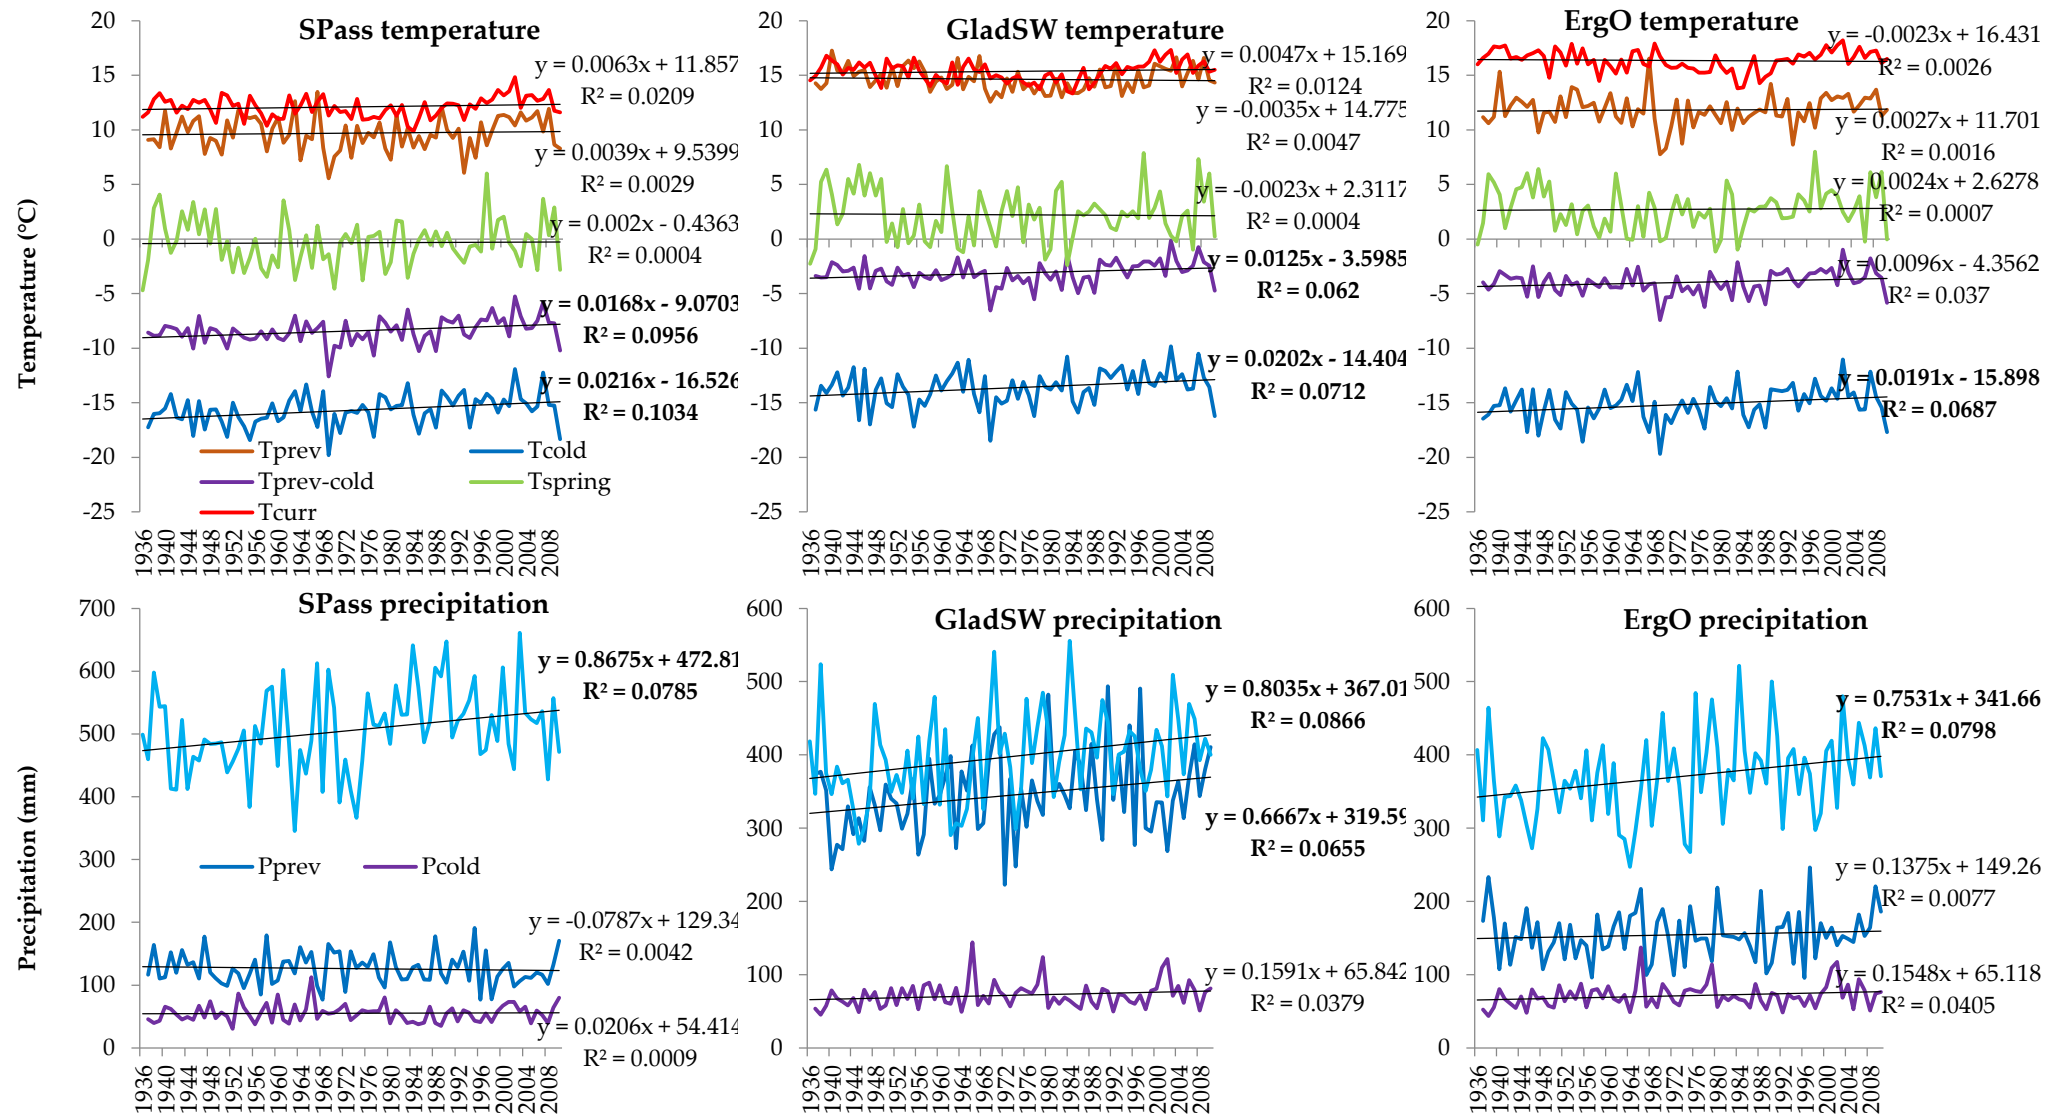

**Figure S3.** Long-term dynamics of seasonal climatic factors aggregated from respective grid cell series of ERA-20C daily field (1936–2010) according to the calendar dates in Table 3 for the SPass, GladE, and ErgZ sampling sites (other sites are omitted because between-site differences in climatic trends within the same area were minor due to being caused only by differences in seasonal timeframes). T, temperature; P, precipitation; *prev*, second part of previous warm season; *cold*, cold season; *spring*, early spring season; *curr*, first part of current warm season. Equations represent respective linear trends with bold-highlighted ones being significant at  $p < 0.05$ .
